# Supplementary material for: Synthesis, structure, and fluorescence properties of coordination polymers of 3,5-bis(1′,2′,4′-triazol-1′-yl) pyridine
Source: Royal Society of Chemistry journal article supplement (doi:10.1039/d0ce01649g), 2021-01-01
Supplement: d0ce01649g1.pdf [file d0ce01649g1.pdf]

## Electronic Supplementary Information

### Synthesis, structure, and fluorescence properties of coordination polymers of 3,5-bis(1',2',4'-triazol-1'-yl) pyridine

Huaguang Yu<sup>a,b,\*</sup>, Jing Sun<sup>b</sup>

<sup>a</sup>*Key Laboratory of Optoelectronic Chemical Materials and Devices, Ministry of Education, School of Chemical and Environmental Engineering, Jiangnan University, Wuhan 430056, P. R. China*

<sup>b</sup>*College of Physics Science and Technology, Yangzhou University, Yangzhou 225002, P. R. China*

---

\*Corresponding author. Tel.: +86-27-84225508; fax: +86-27-84225508.  
Email address: hgyu@jhu.edu.cn (Huaguang Yu)

## Contents

|          |                                                          |            |
|----------|----------------------------------------------------------|------------|
| <b>1</b> | <b>Material and methods</b>                              | <b>S5</b>  |
| <b>2</b> | <b>Structure determination of single crystals</b>        | <b>S5</b>  |
| 2.1      | The crystal structure of compound <b>1</b> . . . . .     | S6         |
| 2.2      | The crystal structure of compound <b>2</b> . . . . .     | S7         |
| 2.3      | The crystal structure of compound <b>3</b> . . . . .     | S10        |
| 2.4      | The crystal structure of compound <b>4</b> . . . . .     | S12        |
| <b>3</b> | <b>PXRD and FT-IR</b>                                    | <b>S15</b> |
| <b>4</b> | <b>Photoluminescence properties of compounds 3 and 4</b> | <b>S17</b> |

## List of Tables

|    |                                                                                                                                                                                                                                    |     |
|----|------------------------------------------------------------------------------------------------------------------------------------------------------------------------------------------------------------------------------------|-----|
| S1 | Selected bond lengths (Å) for compound <b>1</b> . . . . .                                                                                                                                                                          | S6  |
| S2 | Selected angles (°) for compound <b>1</b> . . . . .                                                                                                                                                                                | S6  |
| S3 | Selected bond lengths (Å) for compound <b>2</b> . . . . .                                                                                                                                                                          | S7  |
| S4 | Selected angles (°) for compound <b>2</b> . . . . .                                                                                                                                                                                | S8  |
| S5 | Selected bond lengths (Å) for compound <b>3</b> . . . . .                                                                                                                                                                          | S10 |
| S6 | Selected angles (°) for compound <b>3</b> . . . . .                                                                                                                                                                                | S11 |
| S7 | Selected bond lengths (Å) for compound <b>4</b> . . . . .                                                                                                                                                                          | S13 |
| S8 | Selected angles (°) for compound <b>4</b> . . . . .                                                                                                                                                                                | S13 |
| S9 | ICP-AES analysis results for <b>3</b> -Fe(NO <sub>3</sub> ) <sub>3</sub> , <b>3</b> -Ce(NO <sub>3</sub> ) <sub>3</sub> , <b>4</b> -<br>Fe(NO <sub>3</sub> ) <sub>3</sub> and <b>4</b> -Ce(NO <sub>3</sub> ) <sub>3</sub> . . . . . | S18 |

## List of Figures

|     |                                                                                                                                                                                                                                                                                                                                                                                                                                               |     |
|-----|-----------------------------------------------------------------------------------------------------------------------------------------------------------------------------------------------------------------------------------------------------------------------------------------------------------------------------------------------------------------------------------------------------------------------------------------------|-----|
| S1  | The chemical structure of 3,5-bis(1',2',4'-triazol-1'-yl) pyridine (btap) ligand. . . . .                                                                                                                                                                                                                                                                                                                                                     | S5  |
| S2  | Experimental powder X-ray diffraction patterns versus simulated patterns for compounds (a) <b>1</b> , (b) <b>2</b> , (c) <b>3</b> and (d) <b>4</b> . . .                                                                                                                                                                                                                                                                                      | S15 |
| S3  | FT-IR spectra for compounds (a) <b>1</b> , (b) <b>2</b> , (c) <b>3</b> and (d) <b>4</b> . . .                                                                                                                                                                                                                                                                                                                                                 | S16 |
| S4  | The emission spectra of (a) compound <b>3</b> and (b) compound <b>4</b> dispersed in different solvents ( $\lambda_{\text{ex}} = 280$ nm). . . . .                                                                                                                                                                                                                                                                                            | S17 |
| S5  | Emission intensities of (a) compound <b>3</b> and (b) compound <b>4</b> dispersed in different solvents ( $\lambda_{\text{ex}} = 280$ nm). . . . .                                                                                                                                                                                                                                                                                            | S17 |
| S6  | The effect of pH on the emission spectra of (a) compound <b>3</b> and (b) compound <b>4</b> ( $\lambda_{\text{ex}} = 280$ nm). . . . .                                                                                                                                                                                                                                                                                                        | S18 |
| S7  | Linear region of fluorescence intensity of compound <b>3</b> dispersed in deionized water upon addition of (a) $\text{Fe}^{3+}$ , (c) $\text{Ce}^{3+}$ , (e) $\text{Cr}_2\text{O}_7^{2-}$ and (g) $\text{MnO}_4^-$ . Linear region of fluorescence intensity of compound <b>4</b> dispersed in deionized water upon addition of (b) $\text{Fe}^{3+}$ , (d) $\text{Ce}^{3+}$ , (f) $\text{Cr}_2\text{O}_7^{2-}$ and (h) $\text{MnO}_4^-$ . . . | S19 |
| S8  | UV-vis adsorption spectra of $\text{Fe}(\text{NO}_3)_3$ , $\text{Ce}(\text{NO}_3)_3$ , $\text{K}_2\text{Cr}_2\text{O}_7$ and $\text{KMnO}_4$ ( $1 \times 10^{-3}$ M) and the emission spectra of compounds <b>3</b> and <b>4</b> dispersed in deionized water ( $5 \times 10^{-5}$ M). . .                                                                                                                                                    | S20 |
| S9  | Luminescence responses towards different amounts of $\text{H}_2\text{O}_2$ in the aqueous emulsions of (a) compound <b>3</b> and (b) compound <b>4</b> ( $\lambda_{\text{ex}} = 280$ nm). . . . .                                                                                                                                                                                                                                             | S21 |
| S10 | Luminescence responses towards different amounts of $\text{NaClO}$ in the aqueous emulsions of (a) compound <b>3</b> and (b) compound <b>4</b> ( $\lambda_{\text{ex}} = 280$ nm). . . . .                                                                                                                                                                                                                                                     | S21 |

## 1. Material and methods

The ligand 3,5-bis(1',2',4'-triazol-1'-yl) pyridine (btap) was prepared according to the literature method [1, 2]. The structure was determined by single crystal X-ray diffraction,  $^1\text{H}$  and  $^{13}\text{C}\{^1\text{H}\}$  nuclear magnetic resonance (NMR) spectroscopy and mass spectroscopy (MS), and the molecular structure was depicted in Fig. S1.

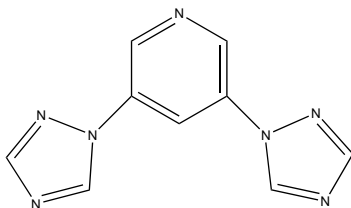

Figure S1: The chemical structure of 3,5-bis(1',2',4'-triazol-1'-yl) pyridine (btap) ligand.

## 2. Structure determination of single crystals

Suitable single crystals of the coordination polymers **1**, **2**, **3** and **4** were selected for single crystal X-ray diffraction analyses. Crystallographic data were collected on a Bruker AXS D8 ADVANCE single crystal X-ray diffractometer with graphite monochromated Mo  $K\alpha$  radiation ( $\lambda = 0.71073 \text{ \AA}$ ). The APEX 3 program was used to collect frames of data, index the reflections and determine the lattice parameters; SAINT [3] was used for the integration of the intensity of the reflections and scaling; SADABS [4] was used for absorption correction; and SHELXTL [5, 6] was used for space-group determinations. The structure was solved by direct methods with SHELXT program [7] and refined by full matrix least-square methods on the basis of  $F^2$  using SHELXL-2014 program [8, 9] contained in OLEX2 suite graphical user interface [10]. The contribution of the disordered solvent molecules to the diffraction pattern could not be rigorously included in the model and were consequently removed with the SQUEEZE routine [11] of PLATON [12] or with the mask tool implemented in OLEX2. All non-hydrogen atoms were refined with anisotropic displacement parameters during the final cycles. All hydrogen atoms of the organic molecule were placed by geometrical considerations and were added to the structure factor calculation. The crystallographic information files (CIFs) were compiled with OLEX2. The program

PLATON enabled checking for additional symmetry elements. The overall structures of the coordination polymers were analyzed by TOPOS software [13]. The formula for **1**, **2**, **3** and **4** were determined by single crystal structure. Crystallographic figures were generated with the Diamond 3.1e software [14]. The detailed bond lengths and bond angles for these compounds were tabulated in Tables S1–S8.

### 2.1. The crystal structure of compound **1**

Table S1: Selected bond lengths (Å) for compound **1**

| <b>bond</b>           | <b>length (Å)</b> | <b>bond</b>           | <b>length (Å)</b> |
|-----------------------|-------------------|-----------------------|-------------------|
| Co1–N1#1 <sup>1</sup> | 2.1780(16)        | C3–C7                 | 1.382(2)          |
| Co1–N1                | 2.1779(16)        | C3–C4                 | 1.393(3)          |
| Co1–N7#2 <sup>1</sup> | 2.1589(15)        | C6–C7                 | 1.384(3)          |
| Co1–N7#3 <sup>1</sup> | 2.1589(15)        | C6–C5                 | 1.391(3)          |
| Co1–O1                | 2.0595(14)        | N4–C5                 | 1.335(3)          |
| Co1–O1#1 <sup>1</sup> | 2.0596(14)        | N4–C4                 | 1.331(3)          |
| N5–C6                 | 1.419(2)          | N2–C1                 | 1.308(3)          |
| N5–C9                 | 1.339(2)          | C9–N7                 | 1.320(2)          |
| N5–N6                 | 1.365(2)          | N7–Co1#4 <sup>1</sup> | 2.1588(15)        |
| N3–C3                 | 1.421(2)          | N7–C8                 | 1.355(3)          |
| N3–C2                 | 1.337(2)          | N6–C8                 | 1.316(3)          |
| N3–N2                 | 1.361(2)          | O1–C10                | 1.240(3)          |
| N1–C2                 | 1.316(2)          | O2–C10                | 1.217(3)          |
| N1–C1                 | 1.352(3)          |                       |                   |

<sup>1</sup> #1:  $-x, 1-y, -z$ ; #2:  $-1/2-x, 1/2+y, -1/2-z$ ;

#3:  $1/2+x, 1/2-y, 1/2+z$ ; #4:  $-1/2-x, -1/2+y, -1/2-z$ .

Table S2: Selected angles (°) for compound **1**

| <b>angle</b>               | <b>(°)</b> | <b>angle</b> | <b>(°)</b> |
|----------------------------|------------|--------------|------------|
| N1–Co1–N1#1 <sup>1</sup>   | 180.0      | C1–N1–Co1    | 124.78(14) |
| N7#2–Co1–N1#1 <sup>1</sup> | 89.46(6)   | C7–C3–N3     | 120.51(16) |
| N7#3–Co1–N1#1 <sup>1</sup> | 90.54(6)   | C7–C3–C4     | 120.34(17) |
| N7#2–Co1–N1 <sup>1</sup>   | 90.54(6)   | C4–C3–N3     | 119.15(16) |
| N7#3–Co1–N1 <sup>1</sup>   | 89.46(6)   | N1–C2–N3     | 110.22(16) |
| N7#2–Co1–N7#3 <sup>1</sup> | 180.0      | C7–C6–N5     | 120.17(16) |

Continued on next page

Table S2 – continued from previous page

| angle                      | (°)        | angle                    | (°)        |
|----------------------------|------------|--------------------------|------------|
| O1–Co1–N1#1 <sup>1</sup>   | 92.48(6)   | C7–C6–C5                 | 120.53(17) |
| O1#1–Co1–N1 <sup>1</sup>   | 92.48(6)   | C5–C6–N5                 | 119.30(17) |
| O1–Co1–N1                  | 87.52(6)   | C4–N4–C5                 | 118.64(17) |
| O1#1–Co1–N1#1 <sup>1</sup> | 87.52(6)   | C3–C7–C6                 | 116.63(17) |
| O1#1–Co1–N7#3 <sup>1</sup> | 94.10(6)   | N4–C5–C6                 | 121.79(18) |
| O1–Co1–N7#3 <sup>1</sup>   | 85.90(6)   | N4–C4–C3                 | 122.06(18) |
| O1–Co1–N7#2 <sup>1</sup>   | 94.10(6)   | C1–N2–N3                 | 102.21(18) |
| O1#1–Co1–N7#2 <sup>1</sup> | 85.90(6)   | N2–C1–N1                 | 115.3(2)   |
| O1–Co1–O1#1 <sup>1</sup>   | 180.0      | N7–C9–N5                 | 110.04(17) |
| C9–N5–C6                   | 129.56(16) | C9–N7–Co1#4 <sup>1</sup> | 127.17(14) |
| C9–N5–N6                   | 109.70(15) | C9–N7–C8                 | 103.10(16) |
| N6–N5–C6                   | 120.72(15) | C8–N7–Co1#4 <sup>1</sup> | 128.55(13) |
| C2–N3–C3                   | 131.13(16) | C8–N6–N5                 | 102.22(17) |
| C2–N3–N2                   | 109.52(16) | N6–C8–N7                 | 114.92(18) |
| N2–N3–C3                   | 119.34(16) | C10–O1–Co1               | 130.38(15) |
| C2–N1–Co1                  | 132.24(13) | O2–C10–O1                | 129.1(2)   |
| C2–N1–C1                   | 102.71(17) |                          |            |

<sup>1</sup> #1:  $-x, 1-y, -z$ ; #2:  $1/2+x, 1/2-y, 1/2+z$ ;

#3:  $-1/2-x, 1/2+y, -1/2-z$ ; #4:  $-1/2-x, -1/2+y, -1/2-z$ .

## 2.2. The crystal structure of compound 2

Table S3: Selected bond lengths (Å) for compound 2

| bond                  | length (Å) | bond     | length (Å) |
|-----------------------|------------|----------|------------|
| Zn1–O1#1 <sup>1</sup> | 1.9698(18) | N9–C19   | 1.343(4)   |
| Zn1–O2#1 <sup>1</sup> | 2.609(2)   | N4–C13   | 1.331(4)   |
| Zn1–O4                | 1.9968(18) | N4–C14   | 1.332(4)   |
| Zn1–N6#2 <sup>1</sup> | 2.009(2)   | N7–C18   | 1.304(4)   |
| Zn1–N1                | 2.014(2)   | N8–C20   | 1.353(4)   |
|                       |            | N8–C19   | 1.321(4)   |
| Zn2–O7                | 2.1408(18) | N10–C20  | 1.307(4)   |
| Zn2–O7#3 <sup>1</sup> | 2.1408(18) | C25–C21  | 1.386(4)   |
| Zn2–O5#3 <sup>1</sup> | 2.0339(17) | C21–C22  | 1.380(4)   |
| Zn2–O5                | 2.0340(17) | C23–C24  | 1.382(4)   |
| Zn2–N8                | 2.239(2)   | C23–C22  | 1.382(4)   |
| Zn2–N8#3 <sup>1</sup> | 2.239(2)   | C23–N12A | 1.39(2)    |

Continued on next page

Table S3 – continued from previous page

| bond                  | length (Å) | bond      | length (Å) |
|-----------------------|------------|-----------|------------|
| O3–C2                 | 1.237(3)   | C23–N12B  | 1.463(16)  |
| O1–Zn1#4 <sup>1</sup> | 1.9698(18) | C2–C6     | 1.500(3)   |
| O1–C1                 | 1.276(3)   |           |            |
| O2–Zn1#4 <sup>1</sup> | 2.609(2)   | C1–C4     | 1.505(3)   |
| O2–C1                 | 1.229(3)   | C16–C15   | 1.380(4)   |
| O4–C2                 | 1.281(3)   | C16–C12   | 1.374(4)   |
| O5–C3                 | 1.259(3)   | C6–C7     | 1.396(3)   |
| O6–C3                 | 1.245(3)   | C6–C5     | 1.394(3)   |
| C3–C8                 | 1.502(3)   | C7–C8     | 1.381(4)   |
| N6–Zn1#5 <sup>1</sup> | 2.009(2)   | C9–C4     | 1.395(3)   |
| N6–C17                | 1.313(3)   | C9–C8     | 1.395(3)   |
| N6–C18                | 1.360(3)   | C4–C5     | 1.382(4)   |
| N11–C25               | 1.341(4)   | C15–C14   | 1.375(4)   |
| N11–C24               | 1.326(4)   | C12–C13   | 1.386(4)   |
| N1–C10                | 1.355(3)   | C26A–N12A | 1.36(2)    |
| N1–C11                | 1.313(3)   | C26A–N13A | 1.353(13)  |
| N3–N2                 | 1.367(3)   | N14B–C27B | 1.322(9)   |
| N3–C11                | 1.328(3)   | N14B–N12B | 1.346(14)  |
| N3–C12                | 1.418(3)   | N14A–N12A | 1.344(18)  |
| N2–C10                | 1.296(3)   | N14A–C27A | 1.336(12)  |
| N5–N7                 | 1.363(3)   | N13B–C27B | 1.278(11)  |
| N5–C17                | 1.327(3)   | N13B–C26B | 1.303(10)  |
| N5–C15                | 1.426(3)   | C26B–N12B | 1.342(15)  |
| N9–N10                | 1.371(3)   | N13A–C27A | 1.300(13)  |
| N9–C21                | 1.418(4)   |           |            |

<sup>1</sup> #1:  $-1 + x, + y, + z$ ; #2:  $+ x, -1 + y, + z$ ;

#3:  $1 - x, 1 - y, - z$ ; #4:  $1 + x, + y, + z$ ;

#5:  $+ x, 1 + y, + z$ .

Table S4: Selected angles (°) for compound **2**

| angle                      | (°)       | angle       | (°)      |
|----------------------------|-----------|-------------|----------|
| O1#1–Zn1–O2#1 <sup>1</sup> | 55.32(7)  | N7–C18–N6   | 113.9(2) |
| O1#1–Zn1–O4 <sup>1</sup>   | 99.36(7)  | N11–C25–C21 | 122.2(3) |
| O1#1–Zn1–N6#2 <sup>1</sup> | 110.62(8) | C25–C21–N9  | 120.5(3) |
| O1#1–Zn1–N1 <sup>1</sup>   | 116.82(9) | C22–C21–N9  | 119.7(3) |
|                            |           | C22–C21–C25 | 119.7(3) |

Continued on next page



Table S4 – continued from previous page

| angle                      | (°)        | angle        | (°)      |
|----------------------------|------------|--------------|----------|
| O4–Zn1–O2#1 <sup>1</sup>   | 154.60(6)  | C24–C23–N12A | 116.0(7) |
| O4–Zn1–N6#2 <sup>1</sup>   | 107.71(8)  | C24–C23–N12B | 123.4(6) |
| O4–Zn1–N1                  | 103.70(8)  | C22–C23–C24  | 120.0(3) |
|                            |            | C22–C23–N12A | 122.9(8) |
|                            |            | C22–C23–N12B | 116.2(6) |
| N6#2–Zn1–O2#1 <sup>1</sup> | 85.77(8)   | N11–C24–C23  | 122.5(3) |
| N6#2–Zn1–N1 <sup>1</sup>   | 116.44(9)  | C21–C22–C23  | 117.4(3) |
|                            |            | O3–C2–O4     | 122.7(2) |
|                            |            | O3–C2–C6     | 120.1(2) |
| N1–Zn1–O2#1 <sup>1</sup>   | 88.41(8)   | O4–C2–C6     | 117.2(2) |
|                            |            |              |          |
| O7#3–Zn2–O7 <sup>1</sup>   | 180.00(6)  | O1–C1–C4     | 116.8(2) |
| O7–Zn2–N8                  | 92.70(8)   |              |          |
| O7#3–Zn2–N8 <sup>1</sup>   | 87.30(8)   | O2–C1–O1     | 122.9(2) |
| O7–Zn2–N8#3 <sup>1</sup>   | 87.30(8)   | O2–C1–C4     | 120.3(2) |
| O7#3–Zn2–N8#3 <sup>1</sup> | 92.70(8)   |              |          |
| O5–Zn2–O7                  | 86.85(7)   |              |          |
| O5–Zn2–O7#3 <sup>1</sup>   | 93.15(7)   | C12–C16–C15  | 116.6(2) |
| O5#3–Zn2–O7 <sup>1</sup>   | 93.15(7)   | C7–C6–C2     | 121.7(2) |
| O5#3–Zn2–O7#3 <sup>1</sup> | 86.85(7)   | C5–C6–C2     | 119.8(2) |
| O5#3–Zn2–O5 <sup>1</sup>   | 180.0      | C5–C6–C7     | 118.5(2) |
| O5#3–Zn2–N8#3 <sup>1</sup> | 90.40(8)   | C8–C7–C6     | 120.9(2) |
| O5–Zn2–N8#3 <sup>1</sup>   | 89.60(8)   | C8–C9–C4     | 119.6(2) |
| O5#3–Zn2–N8 <sup>1</sup>   | 89.60(8)   | C9–C4–C1     | 121.5(2) |
| O5–Zn2–N8                  | 90.40(8)   | C5–C4–C1     | 118.6(2) |
| N8–Zn2–N8#3 <sup>1</sup>   | 180.0      | C5–C4–C9     | 119.8(2) |
| C1–O1–Zn1#4 <sup>1</sup>   | 105.18(15) | N2–C10–N1    | 114.6(2) |
| C1–O2–Zn1#4 <sup>1</sup>   | 76.53(15)  | C4–C5–C6     | 121.1(2) |
| C2–O4–Zn1                  | 111.28(16) | C16–C15–N5   | 120.1(2) |
| C3–O5–Zn2                  | 130.56(17) | C14–C15–N5   | 119.3(2) |
| O5–C3–C8                   | 116.1(2)   | C14–C15–C16  | 120.5(3) |
| O6–C3–O5                   | 124.7(2)   | N1–C11–N3    | 109.5(2) |
| O6–C3–C8                   | 119.2(2)   | C16–C12–N3   | 120.4(2) |
| C17–N6–Zn1#5 <sup>1</sup>  | 128.06(18) | C16–C12–C13  | 120.4(2) |
| C17–N6–C18                 | 103.8(2)   | C13–C12–N3   | 119.2(2) |
| C18–N6–Zn1#5 <sup>1</sup>  | 128.19(18) | C7–C8–C3     | 119.9(2) |
| C24–N11–C25                | 118.2(3)   | C7–C8–C9     | 120.0(2) |
| C10–N1–Zn1                 | 130.70(18) | C9–C8–C3     | 120.0(2) |

Continued on next page

Table S4 – continued from previous page

| angle      | (°)        | angle          | (°)       |
|------------|------------|----------------|-----------|
| C11–N1–Zn1 | 123.35(17) | N4–C13–C12     | 122.1(3)  |
| C11–N1–C10 | 103.6(2)   | N10–C20–N8     | 115.5(3)  |
| N2–N3–C12  | 121.3(2)   | N4–C14–C15     | 122.4(3)  |
| C11–N3–N2  | 109.9(2)   | N8–C19–N9      | 110.1(2)  |
| C11–N3–C12 | 128.7(2)   | N13A–C26A–N12A | 105.8(11) |
| C10–N2–N3  | 102.4(2)   | C27B–N14B–N12B | 102.4(9)  |
| N7–N5–C15  | 121.4(2)   | C27A–N14A–N12A | 100.5(11) |
| C17–N5–N7  | 109.8(2)   | C27B–N13B–C26B | 101.9(7)  |
| C17–N5–C15 | 128.8(2)   | N13B–C27B–N14B | 116.8(7)  |
| N10–N9–C21 | 120.8(2)   | C26A–N12A–C23  | 126.7(13) |
| C19–N9–N10 | 109.2(2)   | N14A–N12A–C23  | 121.2(14) |
| C19–N9–C21 | 129.3(2)   | N14A–N12A–C26A | 112.1(15) |
| C13–N4–C14 | 118.0(3)   | N13B–C26B–N12B | 112.4(9)  |
| C18–N7–N5  | 102.9(2)   | N14B–N12B–C23  | 123.2(10) |
| N6–C17–N5  | 109.7(2)   | C26B–N12B–C23  | 130.1(9)  |
| C20–N8–Zn2 | 126.8(2)   | C26B–N12B–N14B | 106.1(12) |
| C19–N8–Zn2 | 126.93(19) | C27A–N13A–C26A | 105.0(9)  |
| C19–N8–C20 | 102.9(2)   | N13A–C27A–N14A | 116.4(9)  |
| C20–N10–N9 | 102.3(2)   |                |           |

<sup>1</sup> #1:  $-1 + x, + y, + z$ ; #2:  $+ x, -1 + y, + z$ ;  
#3:  $1 - x, 1 - y, - z$ ; #4:  $1 + x, + y, + z$ ;  
#5:  $+ x, 1 + y, + z$ .

### 2.3. The crystal structure of compound **3**

Table S5: Selected bond lengths (Å) for compound **3**

| bond                  | length (Å) | bond                  | length (Å) |
|-----------------------|------------|-----------------------|------------|
| Cd1–O2                | 2.3598(17) | N2–C12                | 1.424(2)   |
| Cd1–O2#1 <sup>1</sup> | 2.3599(17) | N2–C10                | 1.339(3)   |
| Cd1–N4#2 <sup>1</sup> | 2.424(2)   | N1–C10                | 1.317(3)   |
| Cd1–O1                | 2.4760(16) | N1–C11                | 1.359(3)   |
| Cd1–O1#1 <sup>1</sup> | 2.4761(16) | O3–C2                 | 1.241(3)   |
| Cd1–O7                | 2.2924(17) | O1–C1                 | 1.259(3)   |
| Cd1–O7#1 <sup>1</sup> | 2.2924(17) | O5–Cd2#4 <sup>1</sup> | 2.2893(17) |
| Cd2–O6#3 <sup>1</sup> | 2.5329(19) | O5–C3                 | 1.257(3)   |
| Cd2–O4                | 2.2537(17) | N3–C11                | 1.300(3)   |

Continued on next page

Table S5 – continued from previous page

| bond                  | length (Å) | bond                   | length (Å) |
|-----------------------|------------|------------------------|------------|
| Cd2–N1                | 2.3671(18) | C1–C4                  | 1.503(3)   |
| Cd2–O3                | 2.6147(19) | C12–C13                | 1.384(3)   |
| Cd2–O5#3 <sup>1</sup> | 2.2893(17) | C12–C14                | 1.385(3)   |
| Cd2–O9                | 2.417(2)   | C13–C12#1 <sup>1</sup> | 1.384(3)   |
| Cd2–O8                | 2.327(2)   | C5–C4                  | 1.393(3)   |
| O2–C1                 | 1.253(3)   | C5–C6                  | 1.398(3)   |
| O6–Cd2#4 <sup>1</sup> | 2.5329(19) | C4–C9                  | 1.394(3)   |
| O6–C3                 | 1.237(3)   | C3–Cd2#4 <sup>1</sup>  | 2.755(2)   |
| O4–C2                 | 1.257(3)   | C3–C8                  | 1.505(3)   |
| N4–Cd1#5 <sup>1</sup> | 2.424(2)   | C9–C8                  | 1.393(3)   |
| N4–C14                | 1.339(2)   | C8–C7                  | 1.385(3)   |
| N4–C14#1 <sup>1</sup> | 1.339(2)   | C2–C6                  | 1.500(3)   |
| N2–N3                 | 1.362(2)   | C6–C7                  | 1.396(3)   |

<sup>1</sup> #1: 1 – x, + y, 1/2 – z; #2: + x, 1 + y, + z;

#3: 1/2 – x, –1/2 + y, 3/2 – z; #4: 1/2 – x, 1/2 + y, 3/2 – z;

#5: + x, –1 + y, + z.

Table S6: Selected angles (°) for compound **3**

| angle                      | (°)       | angle                       | (°)        |
|----------------------------|-----------|-----------------------------|------------|
| O2–Cd1–O2#1 <sup>1</sup>   | 78.10(8)  | C14–N4–Cd1#5 <sup>1</sup>   | 120.84(13) |
| O2–Cd1–N4#2 <sup>1</sup>   | 140.95(4) | C14#1–N4–Cd1#5 <sup>1</sup> | 120.84(13) |
| O2#1–Cd1–N4#2 <sup>1</sup> | 140.95(4) | C14#1–N4–C14 <sup>1</sup>   | 118.3(3)   |
| O2#1–Cd1–O1#1 <sup>1</sup> | 53.48(5)  | N3–N2–C12                   | 119.49(17) |
| O2–Cd1–O1                  | 53.48(5)  | C10–N2–N3                   | 108.90(17) |
| O2#1–Cd1–O1 <sup>1</sup>   | 128.72(5) | C10–N2–C12                  | 131.52(18) |
| O2–Cd1–O1#1 <sup>1</sup>   | 128.72(5) | C10–N1–Cd2                  | 140.52(15) |
| N4#2–Cd1–O1#1 <sup>1</sup> | 88.88(3)  | C10–N1–C11                  | 102.91(18) |
| N4#2–Cd1–O1 <sup>1</sup>   | 88.88(3)  | C11–N1–Cd2                  | 116.56(14) |
| O1–Cd1–O1#1 <sup>1</sup>   | 177.75(7) | C2–O3–Cd2                   | 84.66(14)  |
| O7–Cd1–O2                  | 105.25(7) | C1–O1–Cd1                   | 90.34(13)  |
| O7#1–Cd1–O2 <sup>1</sup>   | 86.25(7)  | C3–O5–Cd2#4 <sup>1</sup>    | 97.67(14)  |
| O7#1–Cd1–O2#1 <sup>1</sup> | 105.25(7) | C11–N3–N2                   | 103.22(18) |
| O7–Cd1–O2#1 <sup>1</sup>   | 86.25(7)  | O2–C1–O1                    | 120.2(2)   |
| O7#1–Cd1–N4#2 <sup>1</sup> | 82.69(4)  | O2–C1–C4                    | 118.81(19) |
| O7–Cd1–N4#2 <sup>1</sup>   | 82.69(4)  | O1–C1–C4                    | 120.97(19) |

Continued on next page

Table S6 – continued from previous page

| angle                      | (°)        | angle                      | (°)        |
|----------------------------|------------|----------------------------|------------|
| O7#1–Cd1–O1 <sup>1</sup>   | 88.95(6)   | C13–C12–N2                 | 120.8(2)   |
| O7#1–Cd1–O1#1 <sup>1</sup> | 90.77(6)   | C13–C12–C14                | 120.46(19) |
| O7–Cd1–O1#1 <sup>1</sup>   | 88.95(6)   | C14–C12–N2                 | 118.70(18) |
| O7–Cd1–O1                  | 90.77(6)   | C12–C13–C12#1 <sup>1</sup> | 116.6(3)   |
| O7#1–Cd1–O7 <sup>1</sup>   | 165.37(8)  | C4–C5–C6                   | 120.71(19) |
| O6#3–Cd2–O3 <sup>1</sup>   | 129.00(6)  | C5–C4–C1                   | 120.33(18) |
| O4–Cd2–O6#3 <sup>1</sup>   | 77.30(6)   | C5–C4–C9                   | 119.17(18) |
| O4–Cd2–N1                  | 146.42(7)  | C9–C4–C1                   | 120.45(19) |
| O4–Cd2–O3                  | 52.52(6)   | O6–C3–Cd2#4 <sup>1</sup>   | 66.64(13)  |
| O4–Cd2–O5#3 <sup>1</sup>   | 126.23(7)  | O6–C3–O5                   | 121.9(2)   |
| O4–Cd2–O9                  | 83.79(8)   | O6–C3–C8                   | 120.0(2)   |
| O4–Cd2–O8                  | 104.25(8)  | O5–C3–Cd2#4 <sup>1</sup>   | 55.45(11)  |
| N1–Cd2–O6#3 <sup>1</sup>   | 135.26(6)  | O5–C3–C8                   | 118.1(2)   |
| N1–Cd2–O3                  | 95.74(6)   | C8–C3–Cd2#4 <sup>1</sup>   | 172.33(16) |
| N1–Cd2–O9                  | 82.37(7)   | C8–C9–C4                   | 120.6(2)   |
| O5#3–Cd2–O6#3 <sup>1</sup> | 53.47(6)   | C9–C8–C3                   | 120.22(19) |
| O5#3–Cd2–N1 <sup>1</sup>   | 82.66(6)   | C7–C8–C3                   | 120.04(18) |
| O5#3–Cd2–O3 <sup>1</sup>   | 169.43(8)  | C7–C8–C9                   | 119.71(19) |
| O5#3–Cd2–O9 <sup>1</sup>   | 84.68(7)   | O4–C2–C6                   | 117.1(2)   |
| O5#3–Cd2–O8 <sup>1</sup>   | 101.81(7)  | O3–C2–O4                   | 121.4(2)   |
| O9–Cd2–O6#3 <sup>1</sup>   | 99.84(7)   | O3–C2–C6                   | 121.5(2)   |
| O9–Cd2–O3                  | 84.75(7)   | C5–C6–C2                   | 121.77(19) |
| O8–Cd2–O6#3 <sup>1</sup>   | 96.67(8)   | C7–C6–C5                   | 119.2(2)   |
| O8–Cd2–N1                  | 82.80(7)   | C7–C6–C2                   | 119.06(19) |
| O8–Cd2–O3                  | 88.32(7)   | C8–C7–C6                   | 120.63(19) |
| O8–Cd2–O9                  | 162.91(7)  | N1–C10–N2                  | 110.33(19) |
| C1–O2–Cd1                  | 95.96(14)  | N4–C14–C12                 | 121.92(19) |
| C3–O6–Cd2#4 <sup>1</sup>   | 86.72(14)  | N3–C11–N1                  | 114.6(2)   |
| C2–O4–Cd2                  | 101.34(16) |                            |            |

<sup>1</sup> #1: 1 – x, + y, 1/2 – z; #2: + x, 1 + y, + z;  
#3: 1/2 – x, –1/2 + y, 3/2 – z; #4: 1/2 – x, 1/2 + y, 3/2 – z;  
#5: + x, –1 + y, + z.

#### 2.4. The crystal structure of compound 4

Table S7: Selected bond lengths (Å) for compound 4

| bond                  | length (Å) | bond                   | length (Å) |
|-----------------------|------------|------------------------|------------|
| Cd1–O3                | 2.3360(18) | N7–Cd1#4 <sup>1</sup>  | 2.307(2)   |
| Cd1–O1                | 2.2757(18) | N7–C8                  | 1.355(3)   |
| Cd1–O4#1 <sup>1</sup> | 2.2787(17) | N7–C9                  | 1.326(3)   |
| Cd1–O2#2 <sup>1</sup> | 2.2746(18) | N3–N2                  | 1.365(3)   |
| Cd1–N7#3 <sup>1</sup> | 2.307(2)   | N3–C2                  | 1.339(3)   |
| Cd1–N1                | 2.312(2)   | N3–C3                  | 1.428(3)   |
| O3–C11                | 1.248(3)   | N1–C2                  | 1.321(3)   |
| O1–C10                | 1.254(3)   | N1–C1                  | 1.351(3)   |
| O4–Cd1#1 <sup>1</sup> | 2.2787(17) | N2–C1                  | 1.317(4)   |
| O4–C11                | 1.258(3)   | N6–C8                  | 1.302(3)   |
| O2–Cd1#2 <sup>1</sup> | 2.2746(18) | C6–C7                  | 1.382(3)   |
| O2–C10                | 1.251(3)   | C6–C5                  | 1.390(3)   |
| N4–C4                 | 1.337(3)   | C11–C11#1 <sup>1</sup> | 1.556(5)   |
| N4–C5                 | 1.327(3)   | C10–C10#2 <sup>1</sup> | 1.569(5)   |
| N5–N6                 | 1.368(3)   | C7–C3                  | 1.376(3)   |
| N5–C6                 | 1.416(3)   | C3–C4                  | 1.384(4)   |
| N5–C9                 | 1.335(3)   |                        |            |

<sup>1</sup> #1: 1 – x, – y, 1 – z; #2: 2 – x, – y, 1 – z;

#3: 1 + x, 1/2 – y, 1/2 + z; #4: –1 + x, 1/2 – y, –1/2 + z.

Table S8: Selected angles (°) for compound 4

| angle                      | (°)       | angle                     | (°)        |
|----------------------------|-----------|---------------------------|------------|
| O1–Cd1–O3                  | 83.01(7)  | C2–N3–N2                  | 110.5(2)   |
| O1–Cd1–O4#1 <sup>1</sup>   | 154.78(7) | C2–N3–C3                  | 129.3(2)   |
| O1–Cd1–N7#2 <sup>1</sup>   | 104.83(8) | C2–N1–Cd1                 | 130.41(18) |
| O1–Cd1–N1                  | 86.73(7)  | C2–N1–C1                  | 104.0(2)   |
| O4#1–Cd1–O3 <sup>1</sup>   | 72.30(6)  | C1–N1–Cd1                 | 124.06(17) |
| O4#1–Cd1–N7#2 <sup>1</sup> | 100.33(7) | C1–N2–N3                  | 101.9(2)   |
| O4#1–Cd1–N1 <sup>1</sup>   | 89.40(7)  | C8–N6–N5                  | 102.4(2)   |
| O2#3–Cd1–O3 <sup>1</sup>   | 88.79(7)  | C7–C6–N5                  | 121.1(2)   |
| O2#3–Cd1–O1 <sup>1</sup>   | 73.72(6)  | C7–C6–C5                  | 119.9(2)   |
| O2#3–Cd1–O4#1 <sup>1</sup> | 110.01(7) | C5–C6–N5                  | 119.0(2)   |
| O2#3–Cd1–N7#2 <sup>1</sup> | 86.02(7)  | O3–C11–O4                 | 124.5(2)   |
| O2#3–Cd1–N1 <sup>1</sup>   | 160.03(7) | O3–C11–C11#1 <sup>1</sup> | 117.4(3)   |
| N7#2–Cd1–O3 <sup>1</sup>   | 168.93(7) | O4–C11–C11#1 <sup>1</sup> | 118.1(3)   |

Continued on next page

Table S8 – continued from previous page

| angle                     | (°)        | angle                     | (°)      |
|---------------------------|------------|---------------------------|----------|
| N7#2–Cd1–N1 <sup>1</sup>  | 95.30(8)   | O1–C10–C10#3 <sup>1</sup> | 117.3(3) |
| N1–Cd1–O3                 | 92.92(8)   | O2–C10–O1                 | 124.8(2) |
| C11–O3–Cd1                | 115.47(15) | O2–C10–C10#3 <sup>1</sup> | 117.9(2) |
| C10–O1–Cd1                | 115.05(16) | C3–C7–C6                  | 116.6(2) |
| C11–O4–Cd1#1 <sup>1</sup> | 116.58(15) | N1–C2–N3                  | 109.0(2) |
| C10–O2–Cd1#3 <sup>1</sup> | 114.79(16) | C7–C3–N3                  | 120.0(2) |
| C5–N4–C4                  | 118.4(2)   | C7–C3–C4                  | 121.1(2) |
| N6–N5–C6                  | 120.2(2)   | C4–C3–N3                  | 118.8(2) |
| C9–N5–N6                  | 109.8(2)   | N4–C4–C3                  | 121.5(2) |
| C9–N5–C6                  | 129.8(2)   | N6–C8–N7                  | 115.2(2) |
| C8–N7–Cd1#4 <sup>1</sup>  | 132.22(17) | N7–C9–N5                  | 109.6(2) |
| C9–N7–Cd1#4 <sup>1</sup>  | 124.62(17) | N4–C5–C6                  | 122.5(2) |
| C9–N7–C8                  | 103.0(2)   | N2–C1–N1                  | 114.6(2) |
| N2–N3–C3                  | 120.2(2)   |                           |          |

<sup>1</sup> #1: 1 – x, – y, 1 – z; #2: 1 + x, 1/2 – y, 1/2 + z;  
#3: 2 – x, – y, 1 – z; #4: –1 + x, 1/2 – y, –1/2 + z.

### 3. PXRD and FT-IR

The PXRD patterns of compounds **1**, **2**, **3** and **4** were shown in Fig. S2. All the reflection peaks of the compounds were in good agreement with the corresponding simulated patterns without additional peaks, indicating the high purity of these compounds. The difference in intensities could be due to the preferred orientation in the powder samples.

The FT-IR spectra of compounds **1**, **2**, **3** and **4** (Fig. S3) exhibited related features with the bands at 1700–1300  $\text{cm}^{-1}$  ascribed to the asymmetric and symmetric carboxyl groups in carboxylic acid ligands, and the stretching vibrations of  $\nu_{\text{as}}(\text{C}=\text{C})$ ,  $\nu_{\text{as}}(\text{C}=\text{N})$  and  $\nu_{\text{as}}(\text{N}=\text{N})$  in btap ligand. Vibrational absorption of C=N in btap ligand appeared near 730  $\text{cm}^{-1}$ . The broad absorption peaks near 3400  $\text{cm}^{-1}$  should be attributed to the vibration of  $\nu(\text{OH})$  of water molecules.

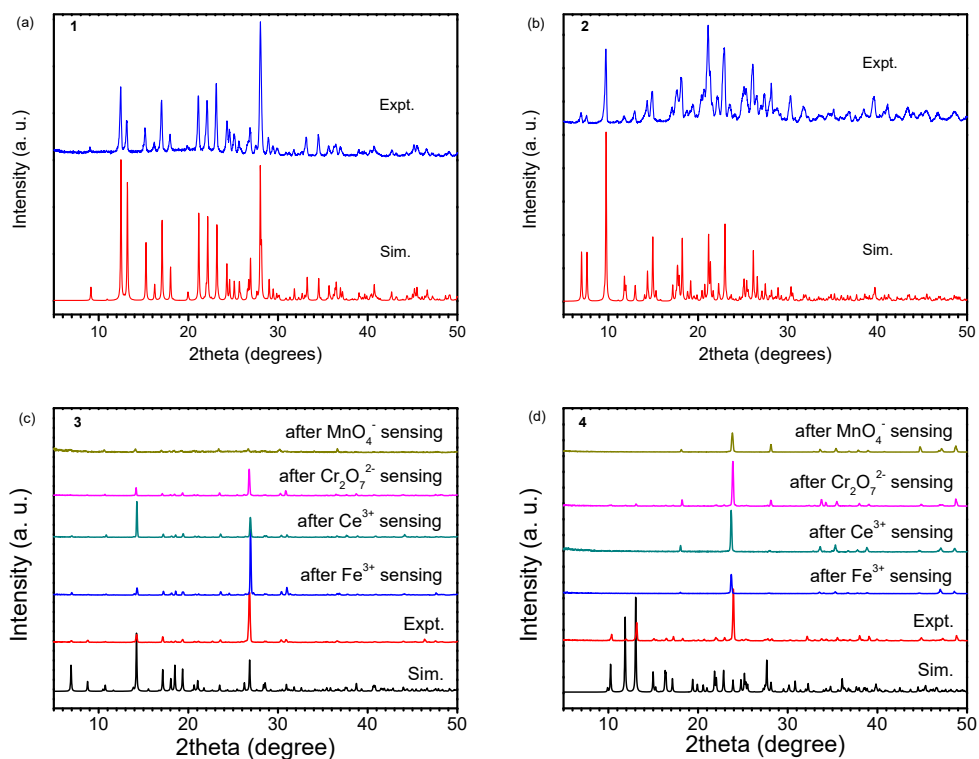

Figure S2: Experimental powder X-ray diffraction patterns versus simulated patterns for compounds (a) **1**, (b) **2**, (c) **3** and (d) **4**.

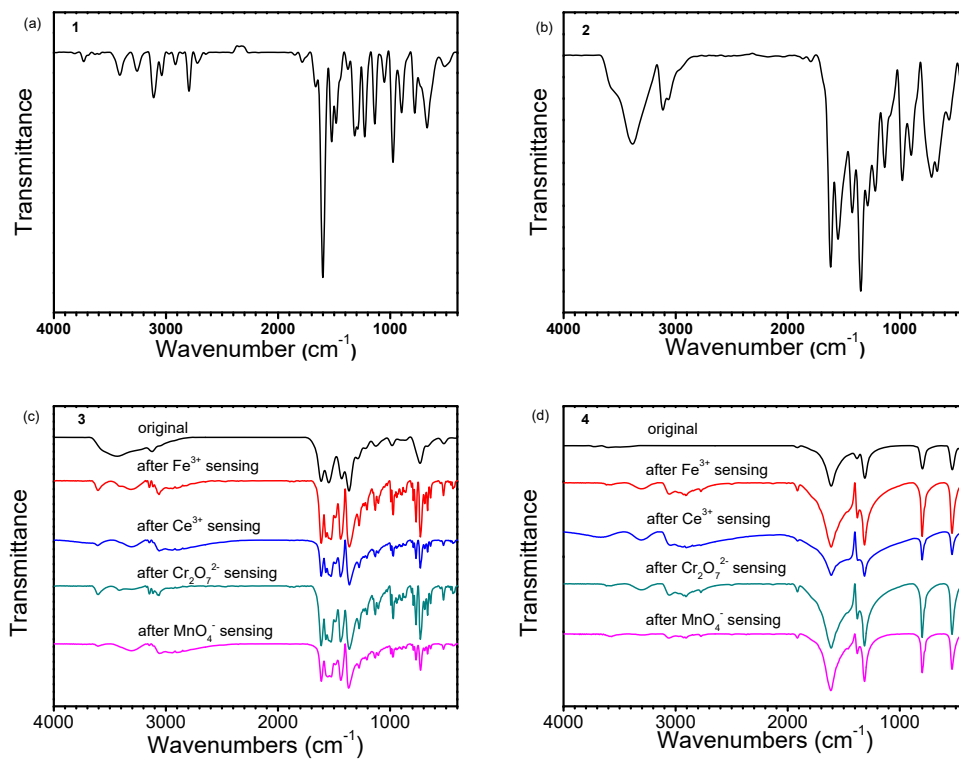

Figure S3: FT-IR spectra for compounds (a) **1**, (b) **2**, (c) **3** and (d) **4**.



#### 4. Photoluminescence properties of compounds **3** and **4**

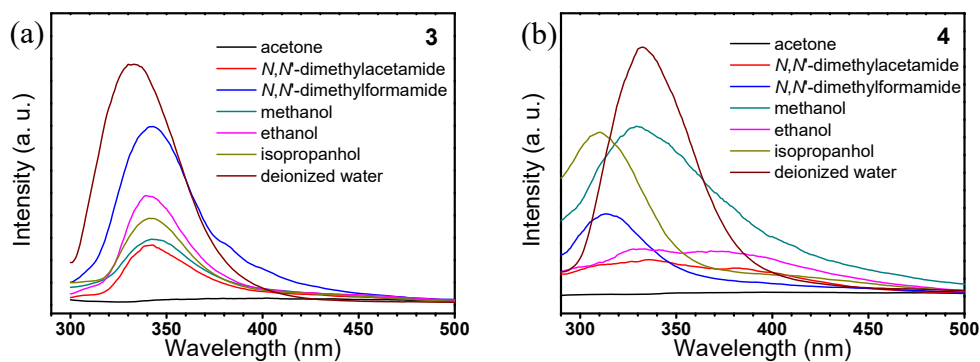

Figure S4: The emission spectra of (a) compound **3** and (b) compound **4** dispersed in different solvents ( $\lambda_{\text{ex}} = 280$  nm).

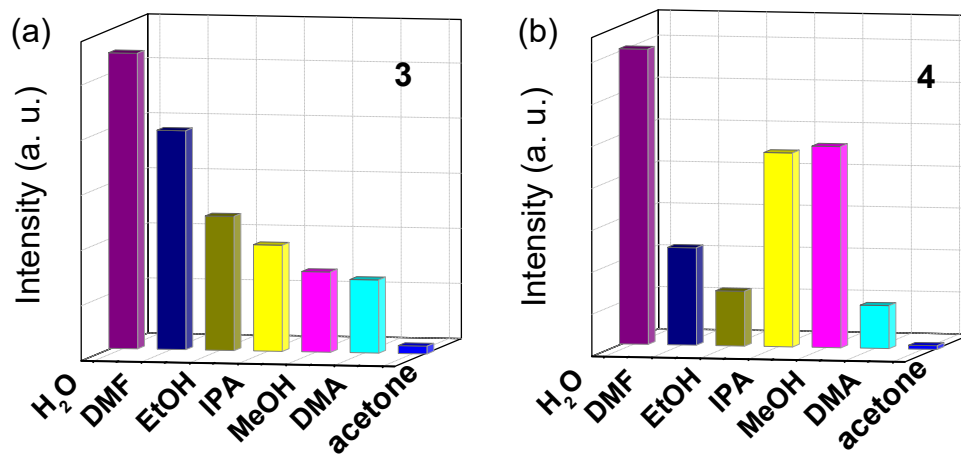

Figure S5: Emission intensities of (a) compound **3** and (b) compound **4** dispersed in different solvents ( $\lambda_{\text{ex}} = 280$  nm).

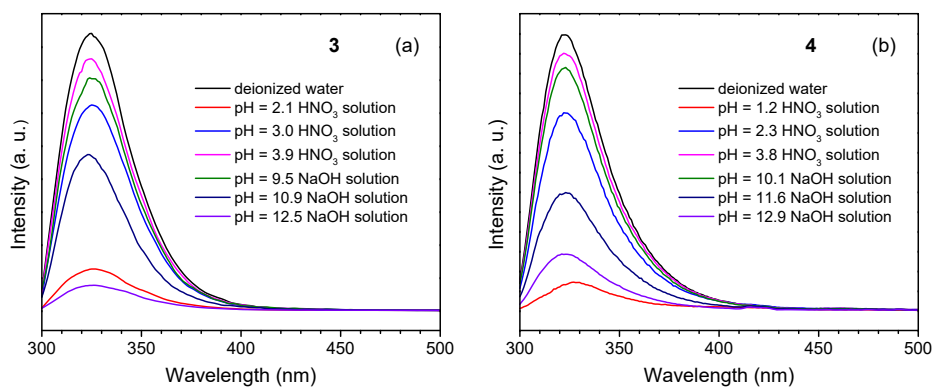

Figure S6: The effect of pH on the emission spectra of (a) compound **3** and (b) compound **4** ( $\lambda_{\text{ex}} = 280 \text{ nm}$ ).

Table S9: ICP-AES analysis results for **3**-Fe(NO<sub>3</sub>)<sub>3</sub>, **3**-Ce(NO<sub>3</sub>)<sub>3</sub>, **4**-Fe(NO<sub>3</sub>)<sub>3</sub> and **4**-Ce(NO<sub>3</sub>)<sub>3</sub>

| Samples                                     | Amount of Fe or Ce | Amount of Cd |
|---------------------------------------------|--------------------|--------------|
| <b>3</b> -Fe(NO <sub>3</sub> ) <sub>3</sub> | 15.8 ppm (Fe)      | 8862 ppm     |
| <b>3</b> -Ce(NO <sub>3</sub> ) <sub>3</sub> | 3.6 ppm (Ce)       | 3560 ppm     |
| <b>4</b> -Fe(NO <sub>3</sub> ) <sub>3</sub> | 15.3 ppm (Fe)      | 2513 ppm     |
| <b>4</b> -Ce(NO <sub>3</sub> ) <sub>3</sub> | 9.3 ppm (Ce)       | 1381 ppm     |

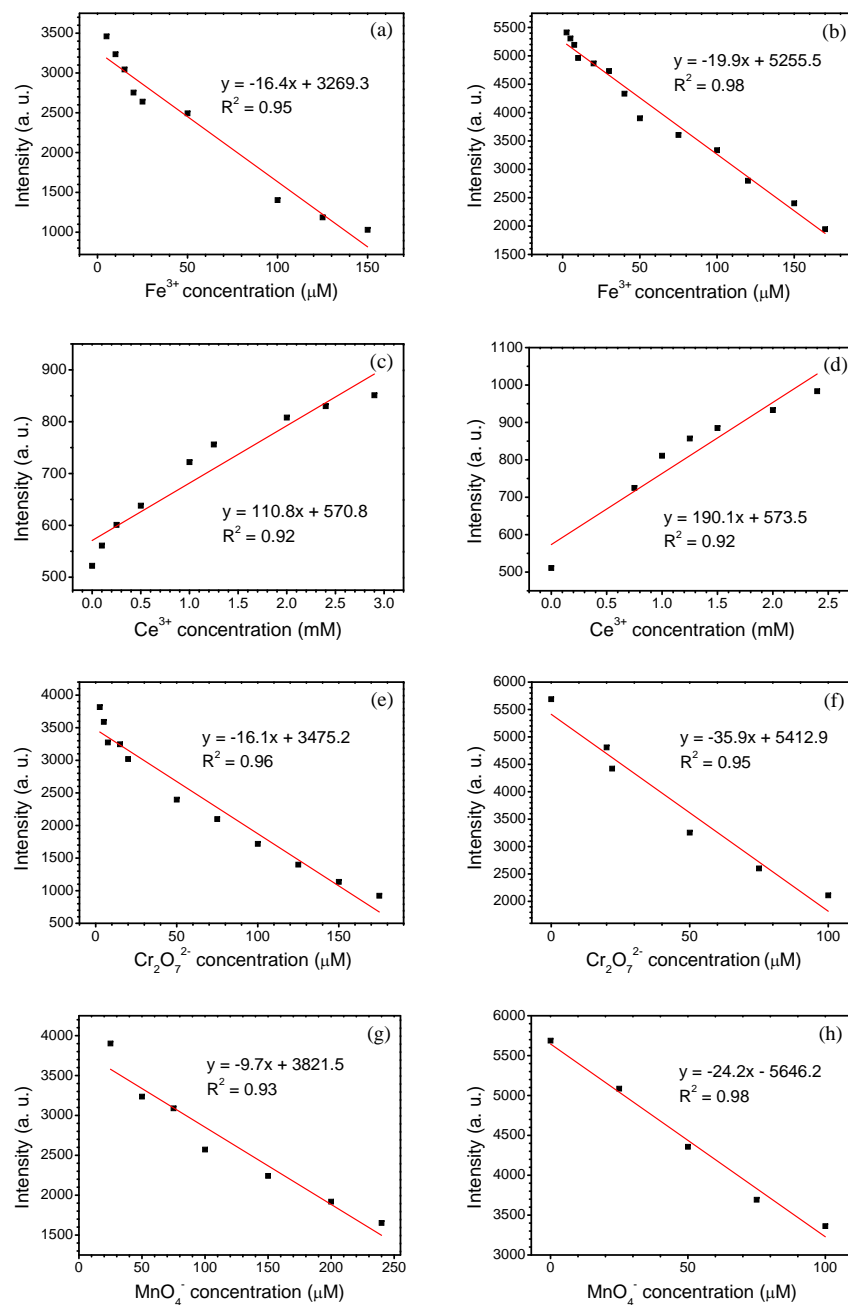

Figure S7: Linear region of fluorescence intensity of compound **3** dispersed in deionized water upon addition of (a)  $\text{Fe}^{3+}$ , (c)  $\text{Ce}^{3+}$ , (e)  $\text{Cr}_2\text{O}_7^{2-}$  and (g)  $\text{MnO}_4^-$ . Linear region of fluorescence intensity of compound **4** dispersed in deionized water upon addition of (b)  $\text{Fe}^{3+}$ , (d)  $\text{Ce}^{3+}$ , (f)  $\text{Cr}_2\text{O}_7^{2-}$  and (h)  $\text{MnO}_4^-$ .

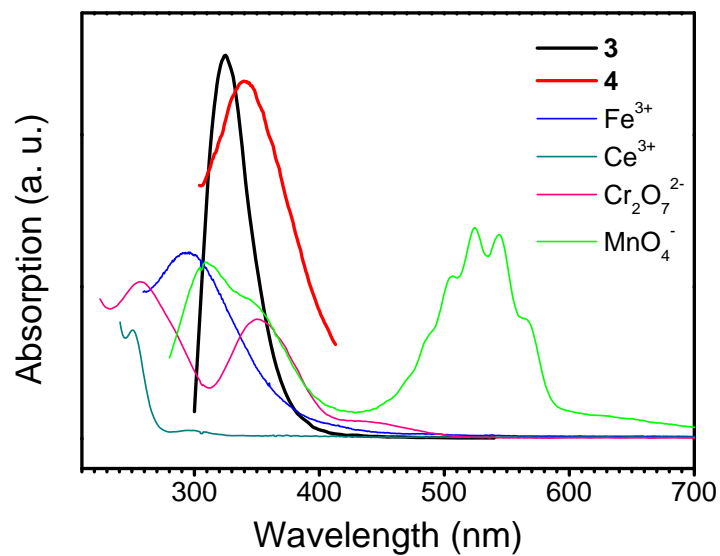

Figure S8: UV-vis adsorption spectra of  $\text{Fe}(\text{NO}_3)_3$ ,  $\text{Ce}(\text{NO}_3)_3$ ,  $\text{K}_2\text{Cr}_2\text{O}_7$  and  $\text{KMnO}_4$  ( $1 \times 10^{-3}$  M) and the emission spectra of compounds **3** and **4** dispersed in deionized water ( $5 \times 10^{-5}$  M).

1 mL 30 % H<sub>2</sub>O<sub>2</sub> and 5–8 % NaClO solutions were diluted in 50 mL deionized water, respectively. The fluorescence titration experiments were performed in 2.0 mL 5 × 10<sup>-5</sup> M aqueous emulsions of compounds **3** and **4** by successive addition of above solutions followed by sonication for 30 min.

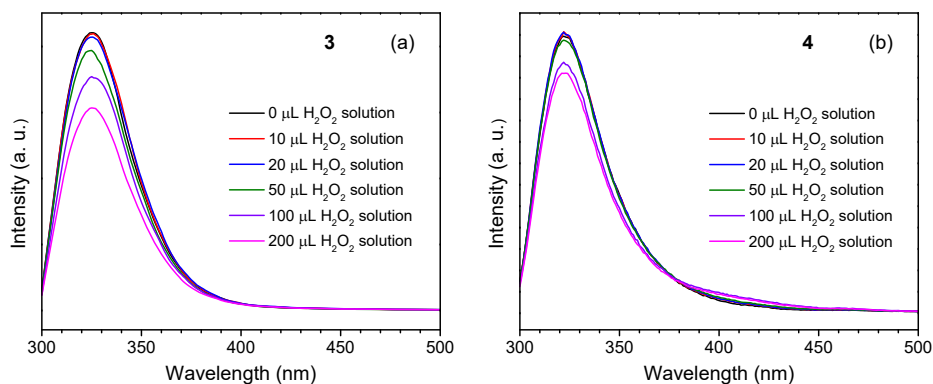

Figure S9: Luminescence responses towards different amounts of H<sub>2</sub>O<sub>2</sub> in the aqueous emulsions of (a) compound **3** and (b) compound **4** ( $\lambda_{\text{ex}} = 280$  nm).

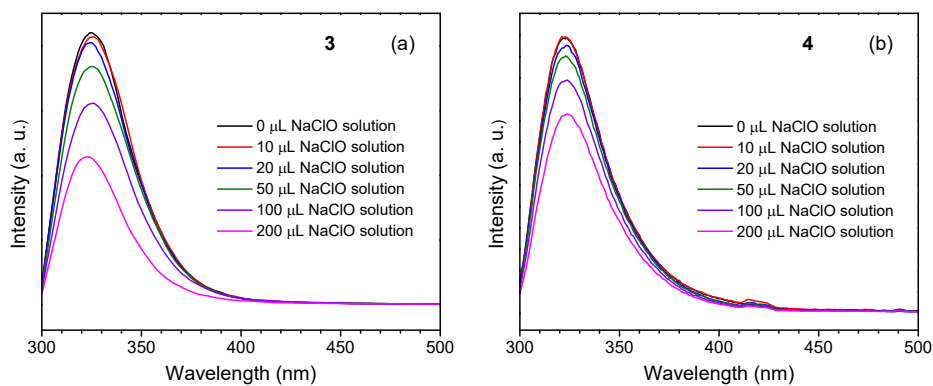

Figure S10: Luminescence responses towards different amounts of NaClO in the aqueous emulsions of (a) compound **3** and (b) compound **4** ( $\lambda_{\text{ex}} = 280$  nm).

## References

## References

- [1] C.-L. Wang, C.-Q. Song, W.-H. Shen, Y.-Y. Qi, Y. Xue, Y.-C. Shi, H. Yu, L. Feng, A two-dimensional Ni(II) coordination polymer based on a 3,5-bis(1',2',4'-triazol-1'-yl)pyridine ligand for water electro-oxidation, *Catal. Sci. Technol.* 9 (2019) 1769–1773. doi:10.1039/C9CY00191C.  
URL <http://dx.doi.org/10.1039/C9CY00191C>
- [2] J. Sun, T. Zhou, D. Pan, X. Zhang, Y. Wang, Y.-C. Shi, H. Yu, Synthesis, structure, and photoluminescence properties of coordination polymers of 4,4',4'',4'''-tetrakis(carboxyphenyl)silane and 3,5-bis(1',2',4'-triazol-1'-yl) pyridine, *CrystEngComm* 22 (2020) 534–545. doi:10.1039/C9CE01529A.  
URL <http://dx.doi.org/10.1039/C9CE01529A>
- [3] Bruker Analytical X-ray Systems, Inc., Madison, WI, SMART & SAINT Software Reference Manuals, 6th Edition (2003).
- [4] G. M. Sheldrick, SADABS: Software for Empirical Absorption Correction, University of Göttingen, 2nd Edition (2002).
- [5] G. M. Sheldrick, SHELXTL, Bruker Analytical X-ray Systems, Inc., Madison, WI, 6th Edition (2001).
- [6] Bruker Analytical X-ray Systems, Inc., Madison, WI, SHELXTL Reference Manual, 6th Edition (2000).
- [7] G. M. Sheldrick, *SHELXT* – Integrated space-group and crystal-structure determination, *Acta Crystallogr., Sect. A* 71 (1) (2015) 3–8. doi:10.1107/S2053273314026370.  
URL <https://doi.org/10.1107/S2053273314026370>
- [8] G. M. Sheldrick, Crystal structure refinement with *SHELXL*, *Acta Crystallogr., Sect. C* 71 (1) (2015) 3–8. doi:10.1107/S2053229614024218.  
URL <https://doi.org/10.1107/S2053229614024218>
- [9] P. Müller, R. Herbst-Irmer, A. L. Spek, T. R. Schneider, M. R. Sawaya, *Crystal Structure Refinement: A Crystallographer's Guide to SHELXL*, Oxford University Press, 2006.

- [10] O. V. Dolomanov, L. J. Bourhis, R. J. Gildea, J. A. K. Howard, H. Puschmann, OLEX2: a complete structure solution, refinement and analysis program, *J. Appl. Crystallogr.* 42 (2) (2009) 339–341. doi:10.1107/S0021889808042726.  
URL <http://dx.doi.org/10.1107/S0021889808042726>
- [11] A. L. Spek, PLATON SQUEEZE: a tool for the calculation of the disordered solvent contribution to the calculated structure factors, *Acta Crystallogr., Sect. C* 71 (1) (2015) 9–18. doi:10.1107/S2053229614024929.  
URL <http://dx.doi.org/10.1107/S2053229614024929>
- [12] A. L. Spek, Structure validation in chemical crystallography, *Acta Crystallogr., Sect. D* 65 (2) (2009) 148–155. doi:10.1107/S090744490804362X.  
URL <http://dx.doi.org/10.1107/S090744490804362X>
- [13] V. A. Blatov, A. P. Shevchenko, D. M. Proserpio, Applied topological analysis of crystal structures with the program package ToposPro, *Cryst. Growth Des.* 14 (7) (2014) 3576–3586. arXiv:<http://dx.doi.org/10.1021/cg500498k>, doi:10.1021/cg500498k.  
URL <http://dx.doi.org/10.1021/cg500498k>
- [14] K. Bradenburg, Diamond, Crystal Impact GbR, Bonn, version 3.1em Edition (2005).
